# Supplementary material
Source: Royal Society of Chemistry journal article supplement (doi:10.1039/d6gc01194b)
Supplement: d6gc01194b1.pdf [file d6gc01194b1.pdf]

*Supporting information*

**Photothermal catalytic CO<sub>2</sub> oxidative propane dehydrogenation over an oxygen-vacancy-rich perovskite-type CeNiO<sub>3</sub> catalyst**

Chun-Fei Li,<sup>a</sup> Zhen-Hong He,<sup>a,\*</sup> Mei-Xia Yang,<sup>a</sup> Yu-Xuan Ji,<sup>a</sup> Sen-Wang Wang,<sup>a</sup> Meng-Nan Liu,<sup>a</sup>  
Weitao Wang,<sup>a</sup> Kuan Wang,<sup>a</sup> Huan Wang,<sup>a</sup> Zhao-Tie Liu<sup>a,b,\*</sup>

<sup>a</sup>Shaanxi Key Laboratory of Chemical Additives for Industry, College of Chemistry and Chemical Engineering, Shaanxi University of Science & Technology, Xi'an 710021, China.

<sup>b</sup>School of Chemistry & Chemical Engineering, Shaanxi Normal University, Xi'an 710119, China.

Corresponding authors: Z.-H. He, [hezhenhong@sust.edu.cn](mailto:hezhenhong@sust.edu.cn); Z.-T. Liu, [ztliu@snnu.edu.cn](mailto:ztliu@snnu.edu.cn)

# 1. Experimental

## 2.1 Materials

$\text{Ce}(\text{NO}_3)_3 \cdot 6\text{H}_2\text{O}$  (99.5%),  $\text{Ni}(\text{NO}_3)_2 \cdot 6\text{H}_2\text{O}$  (99.9%), and  $\text{C}_6\text{H}_8\text{O}_7$  (99.5%) were provided by Aladdin Industrial Co., Ltd. The experimental gases were sourced from Xi'an TEDA Cryogenic Equipment Co., Ltd. All chemicals were used directly without any purification.

## 2.2 Preparation of catalysts

The  $\text{CeNiO}_3$  catalyst was synthesized via a citric acid-assisted sol-gel route, and the main procedures are given in **Fig. 1a**. Stoichiometric quantities of  $\text{Ni}(\text{NO}_3)_2 \cdot 6\text{H}_2\text{O}$  (1.45g) and  $\text{Ce}(\text{NO}_3)_3 \cdot 6\text{H}_2\text{O}$  (2.17 g), corresponding to a Ni/Ce molar ratio of 1:1, were dissolved in 20 mL of deionized water. An appropriate amount of anhydrous citric acid and ethanol was then added to the solution as chelating agents. After stirring until a homogeneous solution was obtained, the mixture was continuously agitated in an 80 °C oil bath to facilitate gel formation. The precursor gel was dried in an oven at 100 °C for 12 h, yielding a green, porous mesh-like material. This dried product was ground into a fine powder in an agate mortar and subsequently subjected to a two-step thermal treatment: pre-calcination in a muffle furnace at 450 °C for 2 h, followed by annealing at 650 °C for an additional 2 h. For comparative purposes, pure  $\text{CeO}_2$  and NiO catalysts were also prepared following the identical procedure. **Fig. S1 shows the photographs of  $\text{CeNiO}_3$ ,  $\text{CeO}_2$ , and NiO samples.**

## 2.3 Catalyst characterization and photoelectric properties tests

XRD patterns were recorded on a Bruker D8 Advance X-ray diffractometer using  $\text{Cu K}\alpha$  radiation ( $\lambda=0.154$  nm). Data were collected in the  $2\theta$  range of 5° to 80° at a scanning rate of 5°/min.

$\text{N}_2$  physisorption measurements were conducted on a Micromeritics ASAP 2460 analyzer at -196 °C. The catalyst was pre-treated by degassing at 120 °C for 12 h under vacuum to remove moisture and other adsorbates.

The morphology and size of the catalyst were characterized using a Tecnai G2 F20 TEM operating at 200 kV. For testing, a small amount of powder sample was dispersed in ethanol, sonicated for 30 min, and then dropped onto silicon wafers and copper grids using a pipette. The samples were dried before testing.

XPS was performed on a Thermo ESCALAB 250XI equipped with 300 W Al  $\text{K}\alpha$  radiation (HV =1486.6 eV) and a hemispherical energy analyzer. The binding energy was referenced to the C 1s peak

at 284.6 eV. Surface concentrations of C, O, Ni, and Ce were determined by integrating the areas of the O 1s, Ni 2p, and Ce 3d peaks using XPS peak software.

EPR testing was conducted on a Bruker A300 instrument to determine the VO<sub>s</sub> (O<sub>V</sub>) of the catalyst.

The ultraviolet-visible (UV-Vis) absorption characteristics of the samples were characterized using a Cary 5000 UV-Vis spectrophotometer (Agilent, USA) across the wavelength range of 200-800 nm.

EIS testing was performed on a CHI660 electrochemical workstation (CH instrument, Shanghai Chenhua Instrument Co., Ltd., China). For testing, a mixture of the sample (15 mg) and Nafion (5%, 0.05 mL) in 1 mL of isopropanol was sonicated for 30 min. The mixture was then evenly dispersed on conductive glass (1.0 cm × 1.0 cm). EIS testing was conducted in a 0.5 mol/L Na<sub>2</sub>SO<sub>4</sub> electrolyte. The photocurrent time test followed the same procedure but used a 300 W xenon lamp as the light source.

Prior to CO<sub>2</sub>-TPD measurements, the catalyst was pretreated in an He flow (30 mL/min) at 300 °C for 30 min to remove adsorbed moisture. After cooling to 50 °C under He, the catalyst was saturated with CO<sub>2</sub> for 60 min, followed by purging with He to eliminate any physisorbed CO<sub>2</sub>. The TPD profile was then recorded under He flow while heating from 50 to 700 °C at a constant rate of 10 °C/min by using a TCD detector.

*In-situ* DRIFTS measurements were performed to detect and characterize potential surface intermediates on the CeNiO<sub>3</sub> catalyst under thermal catalytic reaction conditions (temperature range 150-300 °C). Spectra were collected using an MCT detector. Prior to measurement, the catalyst was pre-treated with Ar at 200 °C for 120 minutes and then naturally cooled to room temperature.

#### **2.4 Catalyst evaluation in photothermal catalytic CO<sub>2</sub>-ODHP**

The photo-thermal catalytic CO<sub>2</sub> oxidative dehydrogenation of propane (CO<sub>2</sub>-ODHP) was performed in a customized reactor (180 mL) equipped with an internal quartz liner and a top sapphire window. Typically, 30 mg of the catalyst was uniformly dispersed within the quartz liner, which was then placed inside the reactor. After sealing, the reactor was evacuated to remove residual air and subsequently charged with the reaction gas mixture (30 mL C<sub>3</sub>H<sub>8</sub> and 150 mL CO<sub>2</sub>).

The reaction was initiated by simultaneously switching on a xenon lamp and heating the reactor with an external electric furnace to the target temperature of 300 °C. The gaseous products were analyzed using an online gas chromatograph (GC). Hydrocarbons, including CH<sub>4</sub>, C<sub>2</sub>H<sub>6</sub>, C<sub>2</sub>H<sub>4</sub>, C<sub>3</sub>H<sub>8</sub>,

C<sub>3</sub>H<sub>6</sub>, and C<sub>4</sub>H<sub>10</sub> (primarily *n*-butane), were separated using an Agilent capillary column (0.53 mm × 50 m, 15.0 μm film thickness) and detected by a flame ionization detector (FID). Permanent gas CO<sub>2</sub> was analyzed using a thermal conductivity detector (TCD) equipped with a combination of Porapak Q, GDX-502, and 5A molecular sieve packed columns.

## 2.5 Calculation of solar to chemical energy conversion efficiency (η<sub>SCC</sub>):

Given the present reaction network is complicated, and the solar-to-chemical conversion efficiency (SCC) was analyzed by assuming the reactants follows the reaction of CO<sub>2</sub> + C<sub>3</sub>H<sub>8</sub> → CO + C<sub>3</sub>H<sub>6</sub> + H<sub>2</sub>O. The SCC was experimentally determined using a reaction vessel loaded with 30 mg of the CeNiO<sub>3</sub> catalyst. The light intensity was measured using a PL-MW2000 optical power meter. After 1 hour of illumination, the reaction products were collected and quantified via gas chromatography. The SCC was then calculated according to the following formula <sup>[1]</sup>:

$$\text{SCC} = \frac{\Delta_r G \times n_{\text{C}_3\text{H}_6}}{t_{\text{ir}} \times S_{\text{ir}} \times I} \times 100\%$$

where  $\Delta_r G$  is the free energy change for the reaction (68.3 kJ mol<sup>-1</sup>);  $n_{\text{C}_3\text{H}_6}$  is the amount of generated;  $t_{\text{ir}}$  is the irradiation times,  $S_{\text{ir}}$  is the irradiation area,  $S_{\text{ir}} = 4.90 \text{ cm}^2$ ;  $I$  is the overall irradiation intensity,  $I = \text{the intensity of irradiation light (W}\cdot\text{cm}^{-2}) = 0.32 \text{ W}/(3.14 \times 1^2) = 0.1019 \text{ W}\cdot\text{cm}^{-2}$ .

**Table S1.** Specific surface area, pore size, pore volume, and Ce<sup>3+</sup> surface concentration of the CeNiO<sub>3</sub>, CeO<sub>2</sub>, and NiO catalysts

| Entry | Catalysts                         | S <sub>BET</sub><br>(cm <sup>2</sup> ·g <sup>-1</sup> ) | V <sub>Total</sub><br>(cm <sup>3</sup> ·g <sup>-1</sup> ) | D <sub>p</sub><br>(nm) | Ce <sup>3+</sup> /(Ce <sup>3+</sup> +Ce <sup>4+</sup> ) |
|-------|-----------------------------------|---------------------------------------------------------|-----------------------------------------------------------|------------------------|---------------------------------------------------------|
| 1     | CeNiO <sub>3</sub>                | 47                                                      | 0.15                                                      | 12.13                  | 0.42                                                    |
| 2     | CeNiO <sub>3</sub> <sup>[2]</sup> | 30                                                      | 0.06                                                      | 9.21                   | 0.26                                                    |
| 3     | CeO <sub>2</sub>                  | 18                                                      | 0.06                                                      | 11.61                  | 0.37                                                    |
| 4     | NiO                               | 6                                                       | 0.02                                                      | 15.59                  | /                                                       |

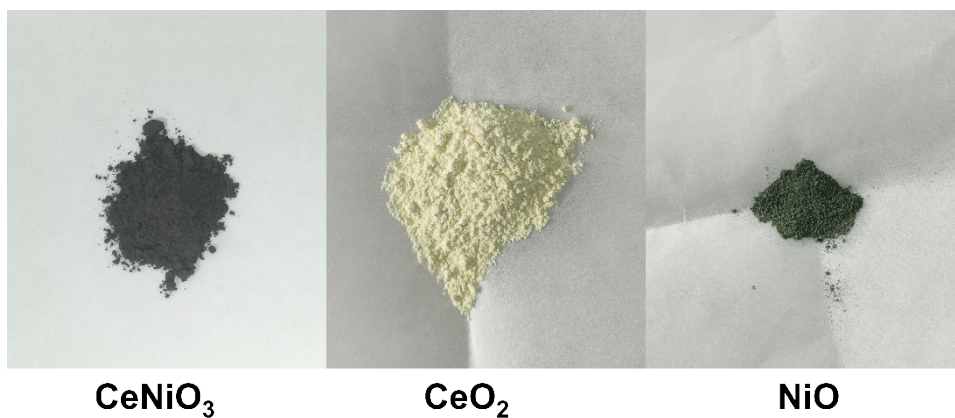

**Fig. S1** Photographs of  $\text{CeNiO}_3$ ,  $\text{CeO}_2$ , and  $\text{NiO}$  samples.

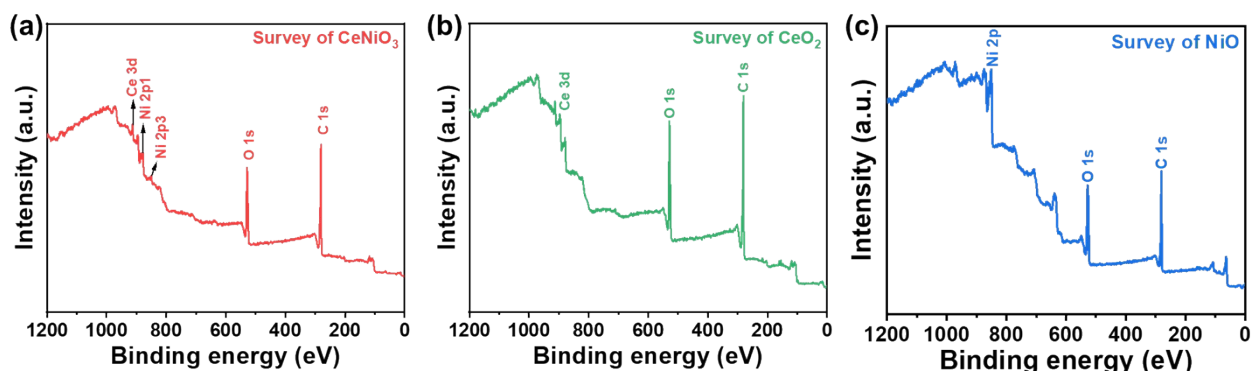

**Fig. S2** Full spectrum analysis of different catalysts, including the full spectrum of the  $\text{CeNiO}_3$  catalyst (a), the  $\text{CeO}_2$  catalyst (b), and the  $\text{NiO}$  catalyst (c)

**Table S2.** Concentration of surface oxygen species over different catalysts

| Entry | Catalysts                     | O 1s (%)         |                |       |
|-------|-------------------------------|------------------|----------------|-------|
|       |                               | Oxygen vacancies | Lattice oxygen | O-H   |
| 1     | CeO <sub>2</sub>              | 35.42            | 39.68          | 24.90 |
| 2     | NiO                           | 34.21            | 44.04          | 21.75 |
| 3     | CeNiO <sub>3</sub>            | 39.97            | 26.01          | 34.02 |
| 4     | CeNiO <sub>3</sub> (reaction) | 38.52            | 29.73          | 31.75 |

**Table S3.** Photothermal catalytic CO<sub>2</sub>-ODHP over different catalysts

| Catalysts          | T (°C) | Gas ratio                                            | Activity ( $\mu\text{mol}\cdot\text{g}_{\text{cat}}^{-1}\cdot\text{h}^{-1}$ ) |       | Ref.      |
|--------------------|--------|------------------------------------------------------|-------------------------------------------------------------------------------|-------|-----------|
|                    |        |                                                      | C <sub>3</sub> H <sub>6</sub>                                                 | CO    |           |
| Co-Mn/MCM-41       | 250    | C <sub>3</sub> H <sub>8</sub> /CO <sub>2</sub> = 1/5 | 225.7                                                                         | 272.0 | [3]       |
| BiOI               | 270    | C <sub>3</sub> H <sub>8</sub> /CO <sub>2</sub> = 1/5 | 282.6                                                                         | 525.2 | [4]       |
| 40 wt% BiOI/AC     | 300    | C <sub>3</sub> H <sub>8</sub> /CO <sub>2</sub> = 1/5 | 432.1                                                                         | 427.5 | [5]       |
| Pt-GaN/STO         | 300    | C <sub>3</sub> H <sub>8</sub> /CO <sub>2</sub> = 1/5 | 396.7                                                                         | 503.0 | [6]       |
| CeNiO <sub>3</sub> | 300    | C <sub>3</sub> H <sub>8</sub> /CO <sub>2</sub> = 1/5 | 1229.7                                                                        | 876.9 | This Work |

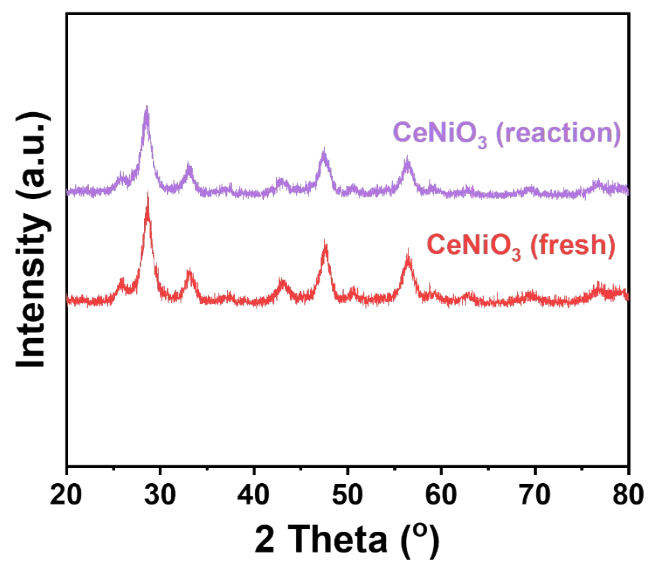

**Fig. S3** XRD spectra of different catalysts and CeNiO<sub>3</sub> catalyst after reaction

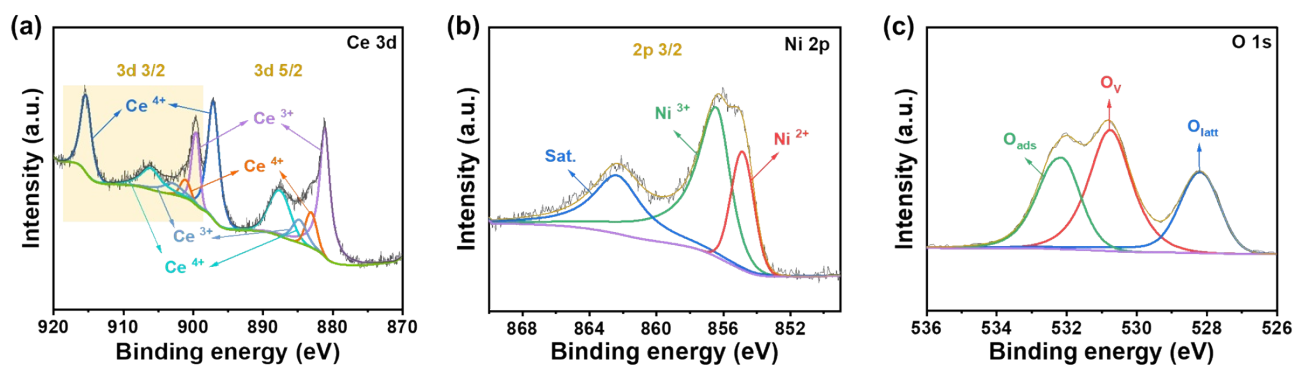

**Fig. S4** The XPS spectrum after the reaction of the CeNiO<sub>3</sub>, Ce 3d (a), Ni 2p (b), and O 1s (c)

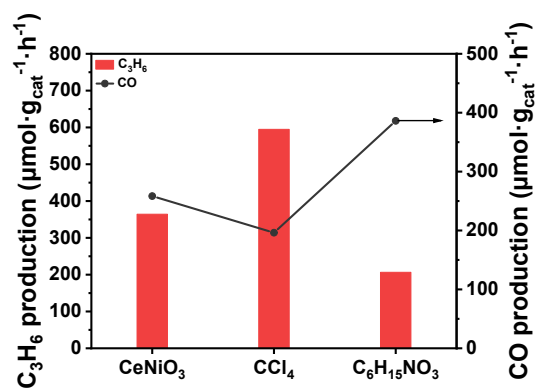

**Fig. S5** Comparative experimental results of adding carbon tetrachloride and triethanolamine. Reaction conditions: total volume 180 mL, C<sub>3</sub>H<sub>8</sub>/CO<sub>2</sub> volume ratio 1/5, 200 °C, catalyst 30 mg, 1 h, 300 W xenon lamp.

## References

- [1] C Feng, J Luo, C Chen, S Zuo, Y Ren, Z Wu, M Hu, Samy Ould-Chikh, Javier Ruiz-Martínez, Y Han, H Zhang. Cooperative tungsten centers in polymeric carbon nitride for efficient overall photosynthesis of hydrogen peroxide. *J. Energy Environ. Sci.*, 2024, 17, 1520-1530.
- [2] P. Du, G. Deng, Z. Li, J. Sun, L. Wang, Y. Yang, J. Wang, Y. Li, X. Xu, Y. Zhang, W. Liu, G. Liu, Z. Zou, Z. Li. Effective CO<sub>2</sub> activation of enriched oxygen vacancies for photothermal CO<sub>2</sub> methanation. *J. Mater. Sci. Technol.*, 2024, 189, 203-210.
- [3] Z. Zhu, Z. He, S. Wang, B. Wu, Y. Tian, Y. Sun, K. Wang, W. Wang, H. Wang, Z. Liu. Photothermal catalytic CO<sub>2</sub> oxidative dehydrogenation of propane over Co-Mn bimetallic oxides supported on MCM-41 molecular sieve. *Mol. Catal.*, 2024, 559, 114070.
- [4] Z. He, B. Wu, Z. Wang, S. Yang, K. Wang, J. Shi, M. He, W. Wang, Z. Liu. Photothermal catalytic CO<sub>2</sub> oxidative dehydrogenation of propane to propylene over BiOX (X = Cl, Br, I) nanocatalysts. *Green Chem.*, 2022, 24, 8270-8279.
- [5] R. Miao, Z. He, B. Wu, J. Liu, S. Wang, K. Wang, W. Wang, L. Li, Z. Liu. Activated carbon-boosted BiOI in CO<sub>2</sub> adsorption and electron transfer for photothermally catalyzed CO<sub>2</sub> oxidative dehydrogenation of propane. *Chem. Eng. J.*, 2024, 481, 148293.
- [6] S. Wang, Z. He, Y. Tian, Z. Zhu, Y. Sun, K. Wang, W. Wang, Y. Yang, H. Wang, Z. Liu. Photothermal catalytic CO<sub>2</sub> oxidative dehydrogenation of propane over a dual functional Pt-GaN/SrTiO<sub>3</sub> catalyst. *Appl. Catal. B: Environ.*, 2024, 356, 124246.
